# Supplementary material
Source: PubMed Central journal article supplement (PMC6218816)

Supplemental material is neither peer-reviewed nor thoroughly edited by CJASN. The authors alone are responsible for the accuracy and presentation of the material.

**Supplemental Table 1: Association between genotype at *CLDN14* SNPs (n=482) and calcium excretion in 24-hour urine in 393 hypertensive patients.**

SNPs starting with "21:" are not yet codified within international database. P value for genotype-phenotype association was estimated with linear regression.

| CHR | SNP         | BP       | N   | BETA    | SE     | R2        | T       | P         |
|-----|-------------|----------|-----|---------|--------|-----------|---------|-----------|
| 21  | rs219780    | 37833307 | 393 | -0.6156 | 0.2974 | 0.01206   | -2.07   | 0.03921   |
| 21  | rs219779    | 37833751 | 393 | -0.7047 | 0.2484 | 0.02242   | -2.837  | 0.004819  |
| 21  | rs117560775 | 37833931 | 393 | -0.8173 | 0.6948 | 0.003927  | -1.176  | 0.2403    |
| 21  | rs113831133 | 37833983 | 393 | -0.8002 | 0.5528 | 0.005936  | -1.448  | 0.1486    |
| 21  | rs128494    | 37834258 | 393 | -0.3425 | 0.273  | 0.004464  | -1.254  | 0.2105    |
| 21  | rs219778    | 37834641 | 393 | -0.7324 | 0.2502 | 0.02383   | -2.927  | 0.003646  |
| 21  | rs219777    | 37834721 | 393 | -0.6894 | 0.2772 | 0.01731   | -2.487  | 0.01336   |
| 21  | rs78250838  | 37834775 | 393 | -0.797  | 0.4634 | 0.008359  | -1.72   | 0.08629   |
| 21  | rs219776    | 37834835 | 393 | -0.7324 | 0.2502 | 0.02383   | -2.927  | 0.003646  |
| 21  | rs2835363   | 37834914 | 393 | -0.7324 | 0.2502 | 0.02383   | -2.927  | 0.003646  |
| 21  | rs219775    | 37834944 | 393 | -0.7324 | 0.2502 | 0.02383   | -2.927  | 0.003646  |
| 21  | rs219774    | 37835043 | 393 | -0.6894 | 0.2772 | 0.01731   | -2.487  | 0.01336   |
| 21  | rs144044511 | 37835111 | 393 | -0.8173 | 0.6948 | 0.003927  | -1.176  | 0.2403    |
| 21  | rs60419768  | 37835164 | 393 | 1.537   | 0.8729 | 0.008756  | 1.761   | 0.07914   |
| 21  | rs141254132 | 37835173 | 393 | -0.6447 | 0.6777 | 0.002571  | -0.9512 | 0.3421    |
| 21  | 21:37835184 | 37835184 | 393 | -0.7111 | 0.2271 | 0.02718   | -3.131  | 0.001885  |
| 21  | 21:37835238 | 37835238 | 393 | -0.733  | 0.2674 | 0.02096   | -2.741  | 0.00643   |
| 21  | 21:37835239 | 37835239 | 393 | -0.7202 | 0.2505 | 0.02301   | -2.876  | 0.00428   |
| 21  | 21:37835240 | 37835240 | 393 | -1.508  | 0.6575 | 0.01477   | -2.294  | 0.02237   |
| 21  | rs219773    | 37835333 | 393 | -0.7389 | 0.2501 | 0.02427   | -2.955  | 0.003339  |
| 21  | rs219772    | 37835347 | 393 | -0.7389 | 0.2501 | 0.02427   | -2.955  | 0.003339  |
| 21  | rs116699215 | 37835445 | 393 | -0.7027 | 0.5923 | 0.003994  | -1.186  | 0.2363    |
| 21  | rs219771    | 37835501 | 393 | -0.7389 | 0.2501 | 0.02427   | -2.955  | 0.003339  |
| 21  | rs219770    | 37835648 | 393 | -0.7389 | 0.2501 | 0.02427   | -2.955  | 0.003339  |
| 21  | rs219769    | 37835675 | 393 | -0.7389 | 0.2501 | 0.02427   | -2.955  | 0.003339  |
| 21  | rs219768    | 37835764 | 393 | -0.7389 | 0.2501 | 0.02427   | -2.955  | 0.003339  |
| 21  | rs12626330  | 37835982 | 393 | -0.7055 | 0.2225 | 0.02784   | -3.17   | 0.001657  |
| 21  | rs219767    | 37836378 | 393 | -0.6978 | 0.2772 | 0.01774   | -2.518  | 0.01226   |
| 21  | rs219766    | 37836477 | 393 | -0.4397 | 0.2681 | 0.007603  | -1.64   | 0.1019    |
| 21  | rs219765    | 37836711 | 393 | -0.142  | 0.3433 | 0.0004869 | -0.4135 | 0.6795    |
| 21  | rs7277076   | 37836973 | 393 | -0.7184 | 0.2275 | 0.02761   | -3.157  | 0.001731  |
| 21  | rs76739387  | 37837101 | 393 | 2.097   | 1.023  | 0.01183   | 2.05    | 0.0411    |
| 21  | rs78262992  | 37837435 | 393 | 2.097   | 1.023  | 0.01183   | 2.05    | 0.0411    |
| 21  | rs219764    | 37837930 | 393 | -0.7897 | 0.259  | 0.02581   | -3.049  | 0.002468  |
| 21  | rs2835364   | 37838111 | 393 | -1.124  | 0.3979 | 0.02222   | -2.824  | 0.005007  |
| 21  | rs219763    | 37838421 | 393 | -0.777  | 0.2481 | 0.02717   | -3.131  | 0.001887  |
| 21  | rs219762    | 37839135 | 393 | -0.4293 | 0.2919 | 0.006123  | -1.471  | 0.1423    |
| 21  | rs219761    | 37839410 | 393 | 0.11    | 0.2977 | 0.0003888 | 0.3695  | 0.712     |
| 21  | rs146029576 | 37839640 | 393 | -0.8173 | 0.6948 | 0.003927  | -1.176  | 0.2403    |
| 21  | rs148622363 | 37839800 | 393 | -0.8173 | 0.6948 | 0.003927  | -1.176  | 0.2403    |
| 21  | rs219760    | 37839815 | 393 | -0.5247 | 0.2754 | 0.01024   | -1.905  | 0.05755   |
| 21  | rs219759    | 37839829 | 393 | 0.06617 | 0.3413 | 0.0001071 | 0.1939  | 0.8464    |
| 21  | rs219758    | 37840173 | 393 | -0.8442 | 0.2454 | 0.0326    | -3.439  | 0.0006535 |
| 21  | rs73902529  | 37840548 | 393 | -0.5263 | 0.6329 | 0.001966  | -0.8315 | 0.4062    |
| 21  | rs60482546  | 37840789 | 393 | 2.246   | 0.8732 | 0.0185    | 2.572   | 0.01052   |
| 21  | 21:37840919 | 37840919 | 393 | -0.7718 | 0.2445 | 0.02761   | -3.157  | 0.001734  |
| 21  | 21:37841064 | 37841064 | 393 | -0.712  | 0.2484 | 0.02286   | -2.866  | 0.00441   |
| 21  | rs149147533 | 37841202 | 393 | -0.6339 | 0.6953 | 0.002362  | -0.9117 | 0.3626    |
| 21  | rs178150    | 37841356 | 393 | -0.6436 | 0.243  | 0.01959   | -2.648  | 0.008452  |
| 21  | rs117392071 | 37841508 | 393 | -0.6339 | 0.6953 | 0.002362  | -0.9117 | 0.3626    |
| 21  | 21:37841612 | 37841612 | 393 | -0.8576 | 0.2471 | 0.03317   | -3.47   | 0.000585  |
| 21  | rs56183874  | 37841692 | 393 | -1.124  | 0.3979 | 0.02222   | -2.824  | 0.005007  |
| 21  | rs219757    | 37842040 | 393 | -0.6555 | 0.25   | 0.01921   | -2.622  | 0.009121  |
| 21  | rs74276156  | 37842165 | 393 | 2.246   | 0.8732 | 0.0185    | 2.572   | 0.01052   |
| 21  | rs219756    | 37842468 | 393 | -0.6436 | 0.243  | 0.01959   | -2.648  | 0.008452  |
| 21  | rs74276157  | 37842613 | 393 | 2.246   | 0.8732 | 0.0185    | 2.572   | 0.01052   |
| 21  | rs78832953  | 37843432 | 393 | 2.246   | 0.8732 | 0.0185    | 2.572   | 0.01052   |
| 21  | 21:37843519 | 37843519 | 393 | -0.6436 | 0.243  | 0.01959   | -2.648  | 0.008452  |
| 21  | rs117651866 | 37843781 | 393 | 1.249   | 0.7819 | 0.007215  | 1.597   | 0.1111    |
| 21  | rs2850102   | 37843955 | 393 | 0.1647  | 0.3501 | 0.00063   | 0.4704  | 0.6384    |
| 21  | 21:37844143 | 37844143 | 393 | 0.219   | 0.3128 | 0.001395  | 0.7003  | 0.4842    |
| 21  | rs74883685  | 37844525 | 393 | -0.6339 | 0.6953 | 0.002362  | -0.9117 | 0.3626    |

|    |             |          |     |          |        |           |         |           |
|----|-------------|----------|-----|----------|--------|-----------|---------|-----------|
| 21 | rs79008732  | 37844618 | 393 | 2.097    | 1.023  | 0.01183   | 2.05    | 0.0411    |
| 21 | rs77147525  | 37844722 | 393 | 2.097    | 1.023  | 0.01183   | 2.05    | 0.0411    |
| 21 | rs219755    | 37847170 | 393 | -0.9731  | 0.2529 | 0.04048   | -3.848  | 0.0001414 |
| 21 | rs219754    | 37847341 | 393 | -0.6285  | 0.2418 | 0.01888   | -2.599  | 0.009749  |
| 21 | rs219753    | 37847375 | 393 | -0.6416  | 0.2419 | 0.01965   | -2.652  | 0.008357  |
| 21 | rs219752    | 37847489 | 393 | -0.4611  | 0.2269 | 0.01163   | -2.032  | 0.04288   |
| 21 | rs219751    | 37847649 | 393 | -0.5372  | 0.2315 | 0.01511   | -2.321  | 0.02088   |
| 21 | rs2850108   | 37848101 | 393 | -0.03413 | 0.2905 | 3.931e-05 | -0.1175 | 0.9066    |
| 21 | rs170183    | 37848334 | 393 | -0.4783  | 0.2192 | 0.01338   | -2.182  | 0.02978   |
| 21 | rs79514755  | 37848381 | 393 | 2.097    | 1.023  | 0.01183   | 2.05    | 0.0411    |
| 21 | rs219749    | 37848438 | 393 | -0.4607  | 0.2329 | 0.01102   | -1.978  | 0.04876   |
| 21 | rs219748    | 37848479 | 393 | -0.4607  | 0.2329 | 0.01102   | -1.978  | 0.04876   |
| 21 | rs2845764   | 37848811 | 393 | -0.2053  | 0.3029 | 0.001307  | -0.6779 | 0.4983    |
| 21 | rs141279841 | 37849078 | 393 | 0.95     | 0.8116 | 0.003888  | 1.171   | 0.2426    |
| 21 | rs2249115   | 37849239 | 393 | -0.1144  | 0.3291 | 0.0003442 | -0.3476 | 0.7283    |
| 21 | rs2850110   | 37849501 | 393 | -0.1144  | 0.3291 | 0.0003442 | -0.3476 | 0.7283    |
| 21 | rs55828480  | 37849517 | 393 | 0.338    | 0.5489 | 0.001079  | 0.6159  | 0.5384    |
| 21 | rs143450623 | 37849566 | 393 | 1.249    | 0.7819 | 0.007215  | 1.597   | 0.1111    |
| 21 | rs55801805  | 37849618 | 393 | 0.09498  | 0.5302 | 9.143e-05 | 0.1791  | 0.8579    |
| 21 | rs56260012  | 37849628 | 393 | 0.286    | 0.5409 | 0.0007962 | 0.5288  | 0.5972    |
| 21 | rs73902533  | 37849769 | 393 | 0.2289   | 0.549  | 0.000495  | 0.4169  | 0.677     |
| 21 | rs219747    | 37849885 | 393 | -0.4805  | 0.2328 | 0.01199   | -2.064  | 0.03978   |
| 21 | rs219746    | 37850027 | 393 | -0.4805  | 0.2328 | 0.01199   | -2.064  | 0.03978   |
| 21 | rs219745    | 37850143 | 393 | -0.4805  | 0.2328 | 0.01199   | -2.064  | 0.03978   |
| 21 | rs219744    | 37850270 | 393 | -0.4805  | 0.2328 | 0.01199   | -2.064  | 0.03978   |
| 21 | rs73902534  | 37850328 | 393 | 0.2289   | 0.549  | 0.000495  | 0.4169  | 0.677     |
| 21 | rs2249234   | 37850468 | 393 | -0.5781  | 0.2398 | 0.01629   | -2.411  | 0.01642   |
| 21 | rs219743    | 37851095 | 393 | -0.5559  | 0.2399 | 0.01507   | -2.318  | 0.02105   |
| 21 | rs188733    | 37851975 | 393 | -0.5559  | 0.2399 | 0.01507   | -2.318  | 0.02105   |
| 21 | rs219742    | 37852001 | 393 | -0.5559  | 0.2399 | 0.01507   | -2.318  | 0.02105   |
| 21 | rs75853875  | 37852444 | 393 | 2.097    | 1.023  | 0.01183   | 2.05    | 0.0411    |
| 21 | rs75639826  | 37853020 | 393 | -0.6835  | 0.5532 | 0.00433   | -1.236  | 0.2175    |
| 21 | rs219741    | 37853036 | 393 | -0.5559  | 0.2399 | 0.01507   | -2.318  | 0.02105   |
| 21 | rs2845765   | 37853079 | 393 | -0.5559  | 0.2399 | 0.01507   | -2.318  | 0.02105   |
| 21 | rs219740    | 37853162 | 393 | -0.5559  | 0.2399 | 0.01507   | -2.318  | 0.02105   |
| 21 | rs55723668  | 37853630 | 393 | 0.2808   | 0.5575 | 0.0007224 | 0.5037  | 0.6148    |
| 21 | rs17283840  | 37853771 | 393 | 0.2808   | 0.5575 | 0.0007224 | 0.5037  | 0.6148    |
| 21 | rs2850111   | 37853812 | 393 | -0.5559  | 0.2399 | 0.01507   | -2.318  | 0.02105   |
| 21 | rs2845766   | 37853912 | 393 | -0.1144  | 0.3291 | 0.0003442 | -0.3476 | 0.7283    |
| 21 | rs56083599  | 37854171 | 393 | -1.079   | 0.4936 | 0.01344   | -2.187  | 0.0294    |
| 21 | rs117271359 | 37854286 | 393 | -0.4429  | 0.9713 | 0.0005921 | -0.456  | 0.6487    |
| 21 | rs2845768   | 37854364 | 393 | -0.6613  | 0.2424 | 0.02077   | -2.728  | 0.006684  |
| 21 | rs2850112   | 37854507 | 393 | -0.6613  | 0.2424 | 0.02077   | -2.728  | 0.006684  |
| 21 | rs2633324   | 37854906 | 393 | -0.6613  | 0.2424 | 0.02077   | -2.728  | 0.006684  |
| 21 | rs78405027  | 37855170 | 393 | 0.09498  | 0.5302 | 9.143e-05 | 0.1791  | 0.8579    |
| 21 | rs73902536  | 37855332 | 393 | 0.2808   | 0.5575 | 0.0007224 | 0.5037  | 0.6148    |
| 21 | rs77868469  | 37855575 | 393 | 0.2808   | 0.5575 | 0.0007224 | 0.5037  | 0.6148    |
| 21 | 21:37855588 | 37855588 | 393 | -0.1446  | 0.3216 | 0.0005754 | -0.4495 | 0.6533    |
| 21 | rs9636632   | 37855760 | 393 | -0.5808  | 0.2157 | 0.02024   | -2.693  | 0.007427  |
| 21 | rs13051241  | 37855854 | 393 | -0.5649  | 0.2158 | 0.01915   | -2.618  | 0.009241  |
| 21 | rs73902538  | 37855873 | 393 | 0.2808   | 0.5575 | 0.0007224 | 0.5037  | 0.6148    |
| 21 | rs13051987  | 37855974 | 393 | -0.5434  | 0.2171 | 0.01754   | -2.504  | 0.01275   |
| 21 | rs35734452  | 37856001 | 393 | -0.5434  | 0.2171 | 0.01754   | -2.504  | 0.01275   |
| 21 | rs59125211  | 37856180 | 393 | -1.032   | 0.4098 | 0.01775   | -2.518  | 0.01223   |
| 21 | rs141426588 | 37856288 | 393 | 2.168    | 1.291  | 0.007971  | 1.679   | 0.09396   |
| 21 | rs75921250  | 37856514 | 393 | -0.07386 | 0.4337 | 8.261e-05 | -0.1703 | 0.8649    |
| 21 | rs219739    | 37856536 | 393 | -0.6613  | 0.2424 | 0.02077   | -2.728  | 0.006684  |
| 21 | rs219738    | 37856682 | 393 | -0.6613  | 0.2424 | 0.02077   | -2.728  | 0.006684  |
| 21 | rs76269285  | 37856773 | 393 | 0.09498  | 0.5302 | 9.143e-05 | 0.1791  | 0.8579    |
| 21 | rs76121568  | 37856776 | 393 | 2.097    | 1.023  | 0.01183   | 2.05    | 0.0411    |
| 21 | rs2633334   | 37856881 | 393 | -0.09845 | 0.285  | 0.0003398 | -0.3454 | 0.73      |
| 21 | rs2845769   | 37856952 | 393 | -0.09845 | 0.285  | 0.0003398 | -0.3454 | 0.73      |
| 21 | rs115462541 | 37857046 | 393 | 0.09498  | 0.5302 | 9.143e-05 | 0.1791  | 0.8579    |
| 21 | rs141184876 | 37857253 | 393 | 0.2808   | 0.5575 | 0.0007224 | 0.5037  | 0.6148    |
| 21 | 21:37857842 | 37857842 | 393 | -0.07472 | 0.3785 | 0.0001111 | -0.1974 | 0.8436    |
| 21 | rs170182    | 37858023 | 393 | -0.1446  | 0.3216 | 0.0005754 | -0.4495 | 0.6533    |
| 21 | rs7277324   | 37858267 | 393 | -0.639   | 0.2425 | 0.01939   | -2.635  | 0.008792  |
| 21 | rs138952890 | 37858280 | 393 | 0.09498  | 0.5302 | 9.143e-05 | 0.1791  | 0.8579    |
| 21 | rs114872540 | 37858540 | 393 | 0.09498  | 0.5302 | 9.143e-05 | 0.1791  | 0.8579    |
| 21 | rs73204269  | 37858922 | 393 | -0.2681  | 0.2981 | 0.002299  | -0.8994 | 0.3691    |
| 21 | rs8132946   | 37858951 | 393 | -0.5504  | 0.4283 | 0.004682  | -1.285  | 0.1996    |

|    |             |          |     |          |        |           |         |         |
|----|-------------|----------|-----|----------|--------|-----------|---------|---------|
| 21 | rs60605101  | 37858957 | 393 | -0.4804  | 0.4848 | 0.002789  | -0.9909 | 0.3224  |
| 21 | rs145081590 | 37859042 | 393 | 1.249    | 0.7819 | 0.007215  | 1.597   | 0.1111  |
| 21 | rs73204270  | 37859210 | 393 | -0.5477  | 0.3422 | 0.007246  | -1.601  | 0.1104  |
| 21 | rs150494374 | 37859449 | 393 | -0.8607  | 0.544  | 0.007081  | -1.582  | 0.1145  |
| 21 | 21:37859666 | 37859666 | 393 | -0.2536  | 0.2452 | 0.003039  | -1.034  | 0.3017  |
| 21 | rs74933634  | 37859875 | 393 | -0.4099  | 0.3778 | 0.003343  | -1.085  | 0.2787  |
| 21 | rs59059205  | 37860623 | 393 | -0.1456  | 0.5633 | 0.0001904 | -0.2585 | 0.7961  |
| 21 | rs59285877  | 37860782 | 393 | -0.1456  | 0.5633 | 0.0001904 | -0.2585 | 0.7961  |
| 21 | rs219736    | 37860785 | 393 | -0.1668  | 0.256  | 0.001209  | -0.6518 | 0.515   |
| 21 | rs141726850 | 37860857 | 393 | -0.4372  | 0.312  | 0.005562  | -1.401  | 0.162   |
| 21 | rs59724458  | 37860863 | 393 | -0.1456  | 0.5633 | 0.0001904 | -0.2585 | 0.7961  |
| 21 | rs117857503 | 37860931 | 393 | 0.3703   | 0.6202 | 0.001015  | 0.5971  | 0.5508  |
| 21 | rs35599107  | 37861015 | 393 | -0.1764  | 0.5228 | 0.0003243 | -0.3375 | 0.736   |
| 21 | rs35857368  | 37861074 | 393 | -0.1456  | 0.5633 | 0.0001904 | -0.2585 | 0.7961  |
| 21 | rs219735    | 37861287 | 393 | -0.5085  | 0.2303 | 0.01369   | -2.208  | 0.02792 |
| 21 | rs219734    | 37861488 | 393 | -0.2154  | 0.243  | 0.002232  | -0.8861 | 0.3762  |
| 21 | 21:37861491 | 37861491 | 393 | 0.1334   | 0.4653 | 0.000234  | 0.2866  | 0.7746  |
| 21 | rs219733    | 37861849 | 393 | -0.1378  | 0.4222 | 0.0003034 | -0.3264 | 0.7443  |
| 21 | rs55666618  | 37861869 | 393 | -0.0767  | 0.4653 | 7.742e-05 | -0.1648 | 0.8692  |
| 21 | rs7279128   | 37861890 | 393 | -0.2863  | 0.3324 | 0.002108  | -0.8612 | 0.3897  |
| 21 | rs13047783  | 37862565 | 393 | -0.1456  | 0.5633 | 0.0001904 | -0.2585 | 0.7961  |
| 21 | rs78013211  | 37863002 | 393 | 0.3703   | 0.6202 | 0.001015  | 0.5971  | 0.5508  |
| 21 | rs219732    | 37864147 | 393 | -0.4219  | 0.2178 | 0.01058   | -1.937  | 0.05349 |
| 21 | rs184320    | 37864471 | 393 | -0.4174  | 0.2594 | 0.007324  | -1.609  | 0.1085  |
| 21 | rs7277448   | 37864870 | 393 | -0.27    | 0.3253 | 0.001959  | -0.83   | 0.4071  |
| 21 | rs2835365   | 37865339 | 393 | -0.5212  | 0.2199 | 0.01576   | -2.371  | 0.0183  |
| 21 | rs35030913  | 37865447 | 393 | -0.1133  | 0.5229 | 0.0001337 | -0.2167 | 0.8286  |
| 21 | rs2850113   | 37865623 | 393 | -0.351   | 0.2777 | 0.004532  | -1.264  | 0.207   |
| 21 | rs2776289   | 37865920 | 393 | -0.3262  | 0.2765 | 0.003949  | -1.18   | 0.2389  |
| 21 | rs2850114   | 37866090 | 393 | -0.2287  | 0.265  | 0.002118  | -0.8631 | 0.3886  |
| 21 | rs2850115   | 37866210 | 393 | -0.4317  | 0.4601 | 0.002502  | -0.9382 | 0.3488  |
| 21 | rs9982279   | 37866276 | 393 | -0.3389  | 0.2428 | 0.005519  | -1.396  | 0.1637  |
| 21 | rs2776290   | 37866324 | 393 | -0.4317  | 0.4601 | 0.002502  | -0.9382 | 0.3488  |
| 21 | rs2071049   | 37866480 | 393 | -0.3467  | 0.243  | 0.005769  | -1.427  | 0.1544  |
| 21 | rs2071050   | 37866528 | 393 | -0.3262  | 0.2765 | 0.003949  | -1.18   | 0.2389  |
| 21 | rs2071051   | 37867187 | 393 | -0.3637  | 0.5026 | 0.00149   | -0.7236 | 0.4698  |
| 21 | rs9974115   | 37867322 | 393 | -0.3474  | 0.2737 | 0.00457   | -1.269  | 0.2051  |
| 21 | rs2071052   | 37867353 | 393 | -0.3669  | 0.2452 | 0.00634   | -1.496  | 0.1354  |
| 21 | rs58865958  | 37868124 | 393 | -0.09537 | 0.381  | 0.0001785 | -0.2503 | 0.8025  |
| 21 | rs117024128 | 37868393 | 393 | 0.5649   | 0.6328 | 0.002266  | 0.8928  | 0.3726  |
| 21 | rs2409819   | 37868619 | 393 | -0.2853  | 0.2677 | 0.003227  | -1.066  | 0.2872  |
| 21 | rs58192378  | 37868817 | 393 | -0.3652  | 0.3446 | 0.003189  | -1.06   | 0.29    |
| 21 | 21:37869713 | 37869713 | 393 | -0.3279  | 0.2678 | 0.004253  | -1.224  | 0.2216  |
| 21 | rs743424    | 37871619 | 393 | -1.202   | 0.6159 | 0.01074   | -1.952  | 0.05169 |
| 21 | rs730265    | 37871886 | 393 | 0.08338  | 0.2846 | 0.0002445 | 0.293   | 0.7697  |
| 21 | rs743425    | 37872004 | 393 | 0.1868   | 0.2683 | 0.001378  | 0.696   | 0.4869  |
| 21 | rs2000544   | 37872116 | 393 | 0.2142   | 0.2396 | 0.002273  | 0.8942  | 0.3718  |
| 21 | rs2000545   | 37872178 | 393 | 0.1787   | 0.2594 | 0.001351  | 0.689   | 0.4913  |
| 21 | rs8129010   | 37872240 | 393 | 0.4075   | 0.3775 | 0.003309  | 1.079   | 0.2811  |
| 21 | rs7276934   | 37872250 | 393 | 0.2806   | 0.2728 | 0.003004  | 1.028   | 0.3045  |
| 21 | rs28491626  | 37872288 | 393 | 0.1923   | 0.2885 | 0.001265  | 0.6667  | 0.5054  |
| 21 | 21:37872317 | 37872317 | 393 | 0.2194   | 0.2329 | 0.002522  | 0.942   | 0.3468  |
| 21 | rs2000546   | 37872447 | 393 | 0.1109   | 0.231  | 0.000656  | 0.48    | 0.6315  |
| 21 | rs9984472   | 37872509 | 393 | 0.2847   | 0.2564 | 0.003499  | 1.11    | 0.2677  |
| 21 | rs76415705  | 37872723 | 393 | 0.9421   | 0.5166 | 0.009385  | 1.824   | 0.06907 |
| 21 | rs75266315  | 37872730 | 393 | -1.286   | 0.6928 | 0.009716  | -1.856  | 0.06433 |
| 21 | rs11700868  | 37873237 | 393 | -0.04984 | 0.3192 | 6.944e-05 | -0.1561 | 0.876   |
| 21 | rs6517354   | 37874417 | 393 | 0.2468   | 0.3784 | 0.00121   | 0.6522  | 0.5147  |
| 21 | rs9680300   | 37874491 | 393 | -1.229   | 0.6754 | 0.009342  | -1.819  | 0.06972 |
| 21 | rs9979731   | 37874585 | 393 | 0.2468   | 0.3784 | 0.00121   | 0.6522  | 0.5147  |
| 21 | rs41513750  | 37874975 | 393 | -1.229   | 0.6754 | 0.009342  | -1.819  | 0.06972 |
| 21 | rs2226830   | 37875622 | 393 | -0.2449  | 0.3207 | 0.001659  | -0.7636 | 0.4456  |
| 21 | rs2409820   | 37875664 | 393 | 0.2318   | 0.4082 | 0.0009178 | 0.5678  | 0.5705  |
| 21 | rs7278261   | 37875771 | 393 | 0.2468   | 0.3784 | 0.00121   | 0.6522  | 0.5147  |
| 21 | rs7279532   | 37875863 | 393 | 0.2468   | 0.3784 | 0.00121   | 0.6522  | 0.5147  |
| 21 | rs4816538   | 37877621 | 393 | 0.07149  | 0.3875 | 9.695e-05 | 0.1845  | 0.8537  |
| 21 | rs116083368 | 37877638 | 393 | -1.286   | 0.6928 | 0.009716  | -1.856  | 0.06433 |
| 21 | rs8127112   | 37878709 | 393 | 0.136    | 0.3642 | 0.0003973 | 0.3735  | 0.709   |
| 21 | rs8127879   | 37878750 | 393 | 0.09116  | 0.39   | 0.0001557 | 0.2338  | 0.8153  |
| 21 | rs7275699   | 37878843 | 393 | -0.2701  | 0.9229 | 0.0002439 | -0.2926 | 0.77    |
| 21 | rs9305585   | 37879118 | 393 | 0.1858   | 0.3762 | 0.0006945 | 0.4939  | 0.6217  |

|    |             |          |     |          |        |           |          |         |
|----|-------------|----------|-----|----------|--------|-----------|----------|---------|
| 21 | rs34494383  | 37879783 | 393 | -1.198   | 1.294  | 0.002436  | -0.9257  | 0.3552  |
| 21 | 21:37880346 | 37880346 | 393 | -1.09    | 0.5941 | 0.009501  | -1.835   | 0.06737 |
| 21 | rs7281847   | 37880347 | 393 | -1.09    | 0.5941 | 0.009501  | -1.835   | 0.06737 |
| 21 | rs7281449   | 37880348 | 393 | -1.09    | 0.5941 | 0.009501  | -1.835   | 0.06737 |
| 21 | rs915750    | 37881540 | 393 | -0.2139  | 0.3217 | 0.001258  | -0.6648  | 0.5066  |
| 21 | rs2298451   | 37881829 | 393 | 0.09116  | 0.39   | 0.0001557 | 0.2338   | 0.8153  |
| 21 | rs16994180  | 37882329 | 393 | -1.09    | 0.5941 | 0.009501  | -1.835   | 0.06737 |
| 21 | rs2835366   | 37883155 | 393 | -0.2701  | 0.9229 | 0.0002439 | -0.2926  | 0.77    |
| 21 | rs2835367   | 37883374 | 393 | -0.2139  | 0.3217 | 0.001258  | -0.6648  | 0.5066  |
| 21 | rs2012586   | 37883667 | 393 | 0.1858   | 0.3762 | 0.0006945 | 0.4939   | 0.6217  |
| 21 | rs16994201  | 37883886 | 393 | -1.09    | 0.5941 | 0.009501  | -1.835   | 0.06737 |
| 21 | rs2835368   | 37884537 | 393 | -0.2139  | 0.3217 | 0.001258  | -0.6648  | 0.5066  |
| 21 | rs9975228   | 37885236 | 393 | 0.1813   | 0.2624 | 0.001358  | 0.691    | 0.49    |
| 21 | rs2835369   | 37885287 | 393 | 0.09116  | 0.39   | 0.0001557 | 0.2338   | 0.8153  |
| 21 | rs2835370   | 37885625 | 393 | 0.1858   | 0.3762 | 0.0006945 | 0.4939   | 0.6217  |
| 21 | rs2835371   | 37885789 | 393 | 0.1816   | 0.3741 | 0.0006705 | 0.4853   | 0.6278  |
| 21 | rs57468042  | 37886169 | 393 | -1.071   | 0.5835 | 0.009507  | -1.836   | 0.06728 |
| 21 | 21:37886171 | 37886171 | 393 | -1.071   | 0.5835 | 0.009507  | -1.836   | 0.06728 |
| 21 | rs4817803   | 37886172 | 393 | -0.1976  | 0.3308 | 0.001016  | -0.5974  | 0.5506  |
| 21 | rs61456276  | 37886225 | 393 | -1.09    | 0.5941 | 0.009501  | -1.835   | 0.06737 |
| 21 | rs4817804   | 37886292 | 393 | 0.1858   | 0.3762 | 0.0006945 | 0.4939   | 0.6217  |
| 21 | rs4817805   | 37886355 | 393 | -0.1927  | 0.332  | 0.0009592 | -0.5805  | 0.5619  |
| 21 | rs11088351  | 37886417 | 393 | -0.1927  | 0.332  | 0.0009592 | -0.5805  | 0.5619  |
| 21 | rs73392037  | 37886484 | 393 | -1.09    | 0.5941 | 0.009501  | -1.835   | 0.06737 |
| 21 | rs2835372   | 37886773 | 393 | -0.2701  | 0.9229 | 0.0002439 | -0.2926  | 0.77    |
| 21 | rs2835373   | 37886803 | 393 | -0.2855  | 0.3329 | 0.002091  | -0.8576  | 0.3917  |
| 21 | 21:37886960 | 37886960 | 393 | -0.2701  | 0.9229 | 0.0002439 | -0.2926  | 0.77    |
| 21 | rs9981161   | 37886989 | 393 | 0.06995  | 0.3784 | 9.732e-05 | 0.1848   | 0.8535  |
| 21 | rs73392039  | 37887100 | 393 | -1.09    | 0.5941 | 0.009501  | -1.835   | 0.06737 |
| 21 | rs73392042  | 37887199 | 393 | -1.09    | 0.5941 | 0.009501  | -1.835   | 0.06737 |
| 21 | rs2835374   | 37887215 | 393 | 0.06995  | 0.3784 | 9.732e-05 | 0.1848   | 0.8535  |
| 21 | rs9982353   | 37887476 | 393 | 0.06995  | 0.3784 | 9.732e-05 | 0.1848   | 0.8535  |
| 21 | rs2187301   | 37887612 | 393 | 0.06995  | 0.3784 | 9.732e-05 | 0.1848   | 0.8535  |
| 21 | rs112427436 | 37887732 | 393 | -1.09    | 0.5941 | 0.009501  | -1.835   | 0.06737 |
| 21 | 21:37888083 | 37888083 | 393 | -0.3166  | 0.3317 | 0.002589  | -0.9546  | 0.3404  |
| 21 | 21:37888088 | 37888088 | 393 | -0.3669  | 0.3304 | 0.0035    | -1.11    | 0.2676  |
| 21 | rs112864362 | 37888089 | 393 | 0.0878   | 0.2941 | 0.000254  | 0.2986   | 0.7654  |
| 21 | rs13052197  | 37888177 | 393 | -0.3506  | 0.3148 | 0.003521  | -1.114   | 0.2662  |
| 21 | rs111644847 | 37888338 | 393 | -1.09    | 0.5941 | 0.009501  | -1.835   | 0.06737 |
| 21 | rs9974188   | 37888400 | 393 | -0.2855  | 0.3329 | 0.002091  | -0.8576  | 0.3917  |
| 21 | rs9305586   | 37889283 | 393 | 0.06995  | 0.3784 | 9.732e-05 | 0.1848   | 0.8535  |
| 21 | rs9305587   | 37889390 | 393 | 0.04545  | 0.3624 | 4.481e-05 | 0.1254   | 0.9003  |
| 21 | rs2835375   | 37889654 | 393 | 0.06995  | 0.3784 | 9.732e-05 | 0.1848   | 0.8535  |
| 21 | rs2835376   | 37889701 | 393 | -0.2855  | 0.3329 | 0.002091  | -0.8576  | 0.3917  |
| 21 | rs2835377   | 37889819 | 393 | 0.06995  | 0.3784 | 9.732e-05 | 0.1848   | 0.8535  |
| 21 | rs4375954   | 37890164 | 393 | -1.09    | 0.5941 | 0.009501  | -1.835   | 0.06737 |
| 21 | rs1124801   | 37890280 | 393 | -0.2855  | 0.3329 | 0.002091  | -0.8576  | 0.3917  |
| 21 | rs78432157  | 37890407 | 393 | -0.2701  | 0.9229 | 0.0002439 | -0.2926  | 0.77    |
| 21 | rs11701001  | 37890621 | 393 | -0.301   | 0.3224 | 0.002476  | -0.9334  | 0.3513  |
| 21 | rs5027467   | 37890653 | 393 | -0.02065 | 0.3951 | 7.783e-06 | -0.05227 | 0.9583  |
| 21 | rs73902562  | 37891455 | 393 | -0.2701  | 0.9229 | 0.0002439 | -0.2926  | 0.77    |
| 21 | rs8130049   | 37891861 | 393 | -0.2111  | 0.319  | 0.001246  | -0.6618  | 0.5085  |
| 21 | rs146408942 | 37891866 | 393 | -0.6977  | 0.5565 | 0.004459  | -1.254   | 0.2107  |
| 21 | rs2835378   | 37892186 | 393 | -0.6977  | 0.5565 | 0.004459  | -1.254   | 0.2107  |
| 21 | 21:37892482 | 37892482 | 393 | -0.2111  | 0.319  | 0.001246  | -0.6618  | 0.5085  |
| 21 | rs2835379   | 37893365 | 393 | -0.02065 | 0.3951 | 7.783e-06 | -0.05227 | 0.9583  |
| 21 | rs2835380   | 37894089 | 393 | -0.2863  | 0.4159 | 0.001348  | -0.6883  | 0.4917  |
| 21 | rs9978278   | 37894721 | 393 | 0.2856   | 0.2876 | 0.002803  | 0.9933   | 0.3212  |
| 21 | rs9978301   | 37894792 | 393 | 0.2856   | 0.2876 | 0.002803  | 0.9933   | 0.3212  |
| 21 | rs2070518   | 37894805 | 393 | 0.2044   | 0.3897 | 0.0007829 | 0.5244   | 0.6003  |
| 21 | rs4816539   | 37895398 | 393 | 0.2044   | 0.3897 | 0.0007829 | 0.5244   | 0.6003  |
| 21 | rs6517359   | 37895670 | 393 | 0.2044   | 0.3897 | 0.0007829 | 0.5244   | 0.6003  |
| 21 | rs7281531   | 37895810 | 393 | 0.2044   | 0.3897 | 0.0007829 | 0.5244   | 0.6003  |
| 21 | rs9680377   | 37895855 | 393 | -0.8655  | 0.5648 | 0.006646  | -1.532   | 0.1263  |
| 21 | rs2187302   | 37895925 | 393 | -0.05553 | 0.2855 | 0.0001078 | -0.1945  | 0.8459  |
| 21 | rs7282508   | 37895937 | 393 | 0.2044   | 0.3897 | 0.0007829 | 0.5244   | 0.6003  |
| 21 | rs2187303   | 37895981 | 393 | -0.05553 | 0.2855 | 0.0001078 | -0.1945  | 0.8459  |
| 21 | 21:37896089 | 37896089 | 393 | -0.08586 | 0.2723 | 0.0002832 | -0.3153  | 0.7527  |
| 21 | rs55758523  | 37896103 | 393 | 0.01889  | 0.2576 | 1.532e-05 | 0.07334  | 0.9416  |
| 21 | rs142588470 | 37896107 | 393 | -0.1244  | 0.3121 | 0.0004525 | -0.3986  | 0.6904  |
| 21 | rs12627295  | 37896459 | 393 | -0.8655  | 0.5648 | 0.006646  | -1.532   | 0.1263  |

Supplemental material is neither peer-reviewed nor thoroughly edited by CJASN. The authors alone are responsible for the accuracy and presentation of the material.

|    |             |          |     |            |        |           |          |        |
|----|-------------|----------|-----|------------|--------|-----------|----------|--------|
| 21 | rs11088353  | 37896560 | 393 | 0.04603    | 0.3763 | 4.263e-05 | 0.1223   | 0.9027 |
| 21 | rs11088354  | 37896674 | 393 | 0.04603    | 0.3763 | 4.263e-05 | 0.1223   | 0.9027 |
| 21 | rs2187304   | 37896871 | 393 | 0.03352    | 0.2194 | 6.651e-05 | 0.1528   | 0.8787 |
| 21 | rs9976609   | 37897709 | 393 | -0.02027   | 0.3004 | 1.298e-05 | -0.06749 | 0.9462 |
| 21 | rs7510508   | 37897743 | 393 | -0.02027   | 0.3004 | 1.298e-05 | -0.06749 | 0.9462 |
| 21 | rs11088355  | 37897932 | 393 | 0.04359    | 0.2636 | 7.792e-05 | 0.1654   | 0.8687 |
| 21 | rs2835381   | 37898114 | 393 | 0.02954    | 0.2343 | 4.529e-05 | 0.1261   | 0.8997 |
| 21 | rs7283212   | 37898162 | 393 | 0.02954    | 0.2343 | 4.529e-05 | 0.1261   | 0.8997 |
| 21 | rs2000547   | 37898358 | 393 | -0.04281   | 0.3742 | 3.727e-05 | -0.1144  | 0.909  |
| 21 | rs17814164  | 37899058 | 393 | -0.0004601 | 0.2659 | 8.528e-09 | -0.00173 | 0.9986 |
| 21 | rs16997926  | 37899076 | 393 | -0.01896   | 0.4607 | 4.826e-06 | -0.04116 | 0.9672 |
| 21 | rs7279600   | 37899588 | 393 | 0.02954    | 0.2343 | 4.529e-05 | 0.1261   | 0.8997 |
| 21 | rs8134973   | 37900128 | 393 | 0.02954    | 0.2343 | 4.529e-05 | 0.1261   | 0.8997 |
| 21 | rs2835382   | 37900377 | 393 | 0.01119    | 0.2194 | 7.412e-06 | 0.05101  | 0.9593 |
| 21 | rs8127992   | 37900418 | 393 | 0.02954    | 0.2343 | 4.529e-05 | 0.1261   | 0.8997 |
| 21 | rs55758428  | 37900970 | 393 | 0.01119    | 0.2194 | 7.412e-06 | 0.05101  | 0.9593 |
| 21 | rs9980855   | 37900971 | 393 | 0.01119    | 0.2194 | 7.412e-06 | 0.05101  | 0.9593 |
| 21 | rs9981041   | 37901131 | 393 | 0.01119    | 0.2194 | 7.412e-06 | 0.05101  | 0.9593 |
| 21 | rs9981423   | 37901584 | 393 | -0.0004601 | 0.2659 | 8.528e-09 | -0.00173 | 0.9986 |
| 21 | rs77602547  | 37902198 | 393 | -0.9105    | 0.9704 | 0.002502  | -0.9383  | 0.3487 |
| 21 | rs2835383   | 37902319 | 393 | 0.01119    | 0.2194 | 7.412e-06 | 0.05101  | 0.9593 |
| 21 | rs73206251  | 37902397 | 393 | 0.5486     | 0.4991 | 0.003431  | 1.099    | 0.2724 |
| 21 | rs2835385   | 37902464 | 393 | 0.02954    | 0.2343 | 4.529e-05 | 0.1261   | 0.8997 |
| 21 | 21:37903588 | 37903588 | 393 | -0.01896   | 0.4607 | 4.826e-06 | -0.04116 | 0.9672 |
| 21 | rs73374416  | 37903677 | 393 | 0.1134     | 0.4563 | 0.000176  | 0.2485   | 0.8039 |
| 21 | rs112204241 | 37903756 | 393 | 0.1134     | 0.4563 | 0.000176  | 0.2485   | 0.8039 |
| 21 | rs8128229   | 37903808 | 393 | -0.001049  | 0.2385 | 5.516e-08 | -0.0044  | 0.9965 |
| 21 | rs2835386   | 37904094 | 393 | 0.02954    | 0.2343 | 4.529e-05 | 0.1261   | 0.8997 |
| 21 | rs2835387   | 37904192 | 393 | 0.02954    | 0.2343 | 4.529e-05 | 0.1261   | 0.8997 |
| 21 | rs1892908   | 37904732 | 393 | -0.05169   | 0.2232 | 0.0001527 | -0.2315  | 0.817  |
| 21 | rs8134335   | 37904950 | 393 | -0.01896   | 0.4607 | 4.826e-06 | -0.04116 | 0.9672 |
| 21 | rs743426    | 37905459 | 393 | 0.02954    | 0.2343 | 4.529e-05 | 0.1261   | 0.8997 |
| 21 | rs13046506  | 37906238 | 393 | 0.01119    | 0.2194 | 7.412e-06 | 0.05101  | 0.9593 |
| 21 | rs914148    | 37907311 | 393 | 0.02033    | 0.2191 | 2.453e-05 | 0.09278  | 0.9261 |
| 21 | 21:37907716 | 37907716 | 393 | 0.02033    | 0.2191 | 2.453e-05 | 0.09278  | 0.9261 |
| 21 | rs6517361   | 37908410 | 393 | 0.02033    | 0.2191 | 2.453e-05 | 0.09278  | 0.9261 |
| 21 | rs1892909   | 37908788 | 393 | 0.02033    | 0.2191 | 2.453e-05 | 0.09278  | 0.9261 |
| 21 | 21:37908877 | 37908877 | 393 | -0.01896   | 0.4607 | 4.826e-06 | -0.04116 | 0.9672 |
| 21 | rs9653721   | 37909342 | 393 | 0.02033    | 0.2191 | 2.453e-05 | 0.09278  | 0.9261 |
| 21 | rs75460038  | 37909662 | 393 | -0.01896   | 0.4607 | 4.826e-06 | -0.04116 | 0.9672 |
| 21 | rs11702057  | 37909704 | 393 | 0.05691    | 0.2637 | 0.0001327 | 0.2158   | 0.8292 |
| 21 | rs4817806   | 37909837 | 393 | 0.02033    | 0.2191 | 2.453e-05 | 0.09278  | 0.9261 |
| 21 | 21:37909953 | 37909953 | 393 | 0.02033    | 0.2191 | 2.453e-05 | 0.09278  | 0.9261 |
| 21 | rs4817807   | 37910136 | 393 | 0.02033    | 0.2191 | 2.453e-05 | 0.09278  | 0.9261 |
| 21 | rs9305590   | 37910446 | 393 | 0.02033    | 0.2191 | 2.453e-05 | 0.09278  | 0.9261 |
| 21 | rs9305591   | 37910600 | 393 | 0.02033    | 0.2191 | 2.453e-05 | 0.09278  | 0.9261 |
| 21 | rs9305592   | 37910625 | 393 | 0.02033    | 0.2191 | 2.453e-05 | 0.09278  | 0.9261 |
| 21 | rs9305593   | 37910660 | 393 | 0.02033    | 0.2191 | 2.453e-05 | 0.09278  | 0.9261 |
| 21 | rs77818738  | 37910661 | 393 | 0.02033    | 0.2191 | 2.453e-05 | 0.09278  | 0.9261 |
| 21 | rs11702700  | 37910671 | 393 | -0.01896   | 0.4607 | 4.826e-06 | -0.04116 | 0.9672 |
| 21 | rs9305594   | 37910772 | 393 | 0.02033    | 0.2191 | 2.453e-05 | 0.09278  | 0.9261 |
| 21 | rs9305595   | 37910869 | 393 | 0.02033    | 0.2191 | 2.453e-05 | 0.09278  | 0.9261 |
| 21 | 21:37910921 | 37910921 | 393 | 0.02033    | 0.2191 | 2.453e-05 | 0.09278  | 0.9261 |
| 21 | 21:37910928 | 37910928 | 393 | 0.02033    | 0.2191 | 2.453e-05 | 0.09278  | 0.9261 |
| 21 | 21:37911057 | 37911057 | 393 | 0.02881    | 0.237  | 4.209e-05 | 0.1216   | 0.9033 |
| 21 | rs79807929  | 37911264 | 393 | -0.01896   | 0.4607 | 4.826e-06 | -0.04116 | 0.9672 |
| 21 | rs4817808   | 37911661 | 393 | 0.02033    | 0.2191 | 2.453e-05 | 0.09278  | 0.9261 |
| 21 | 21:37911688 | 37911688 | 393 | -0.2251    | 0.4749 | 0.0006398 | -0.474   | 0.6358 |
| 21 | rs12626551  | 37912042 | 393 | 0.05691    | 0.2637 | 0.0001327 | 0.2158   | 0.8292 |
| 21 | rs13049189  | 37912192 | 393 | 0.02033    | 0.2191 | 2.453e-05 | 0.09278  | 0.9261 |
| 21 | rs11909578  | 37912551 | 393 | 0.02033    | 0.2191 | 2.453e-05 | 0.09278  | 0.9261 |
| 21 | rs13049736  | 37912557 | 393 | 0.02033    | 0.2191 | 2.453e-05 | 0.09278  | 0.9261 |
| 21 | rs2835389   | 37913465 | 393 | 0.006283   | 0.2198 | 2.329e-06 | 0.02859  | 0.9772 |
| 21 | rs2015187   | 37914484 | 393 | 0.01126    | 0.2205 | 7.431e-06 | 0.05107  | 0.9593 |
| 21 | rs928839    | 37914925 | 393 | -0.04922   | 0.4169 | 3.97e-05  | -0.1181  | 0.9061 |
| 21 | 21:37916041 | 37916041 | 393 | 0.03215    | 0.3011 | 3.249e-05 | 0.1068   | 0.915  |
| 21 | rs80029376  | 37916288 | 393 | -0.3099    | 0.4997 | 0.001095  | -0.6203  | 0.5355 |
| 21 | rs2835390   | 37916734 | 393 | 0.02915    | 0.2192 | 5.039e-05 | 0.133    | 0.8943 |
| 21 | rs13047871  | 37916867 | 393 | 0.03707    | 0.2186 | 8.191e-05 | 0.1696   | 0.8654 |
| 21 | rs73380007  | 37918035 | 393 | 0.06022    | 0.4293 | 5.605e-05 | 0.1403   | 0.8885 |
| 21 | rs448332    | 37919151 | 393 | -0.01971   | 0.3876 | 7.368e-06 | -0.05086 | 0.9595 |

|    |             |          |     |           |        |           |           |        |
|----|-------------|----------|-----|-----------|--------|-----------|-----------|--------|
| 21 | rs448687    | 37919562 | 393 | 0.02408   | 0.39   | 1.086e-05 | 0.06173   | 0.9508 |
| 21 | rs62230972  | 37919610 | 393 | -0.001862 | 0.3004 | 1.094e-07 | -0.006196 | 0.9951 |
| 21 | rs450932    | 37919767 | 393 | 0.002071  | 0.2202 | 2.522e-07 | 0.009409  | 0.9925 |
| 21 | rs441734    | 37919964 | 393 | 0.02408   | 0.39   | 1.086e-05 | 0.06173   | 0.9508 |
| 21 | rs367166    | 37920377 | 393 | 0.02408   | 0.39   | 1.086e-05 | 0.06173   | 0.9508 |
| 21 | rs398591    | 37920769 | 393 | 0.02408   | 0.39   | 1.086e-05 | 0.06173   | 0.9508 |
| 21 | rs439888    | 37920907 | 393 | 0.02408   | 0.39   | 1.086e-05 | 0.06173   | 0.9508 |
| 21 | rs377483    | 37920943 | 393 | 0.002071  | 0.2202 | 2.522e-07 | 0.009409  | 0.9925 |
| 21 | rs377777    | 37921028 | 393 | 0.002071  | 0.2202 | 2.522e-07 | 0.009409  | 0.9925 |
| 21 | rs399711    | 37921138 | 393 | 0.02408   | 0.39   | 1.086e-05 | 0.06173   | 0.9508 |
| 21 | rs400019    | 37921256 | 393 | 0.02408   | 0.39   | 1.086e-05 | 0.06173   | 0.9508 |
| 21 | rs400267    | 37921319 | 393 | 0.02408   | 0.39   | 1.086e-05 | 0.06173   | 0.9508 |
| 21 | rs453539    | 37921417 | 393 | 0.02408   | 0.39   | 1.086e-05 | 0.06173   | 0.9508 |
| 21 | rs400544    | 37921420 | 393 | 0.02408   | 0.39   | 1.086e-05 | 0.06173   | 0.9508 |
| 21 | rs443968    | 37921508 | 393 | 0.02408   | 0.39   | 1.086e-05 | 0.06173   | 0.9508 |
| 21 | rs2845781   | 37921576 | 393 | 0.5299    | 0.5755 | 0.002409  | 0.9207    | 0.3578 |
| 21 | rs449547    | 37921971 | 393 | 0.02408   | 0.39   | 1.086e-05 | 0.06173   | 0.9508 |
| 21 | rs111425381 | 37922258 | 393 | -0.2278   | 0.5059 | 0.0005773 | -0.4503   | 0.6528 |
| 21 | rs447759    | 37922363 | 393 | 0.05522   | 0.301  | 9.586e-05 | 0.1834    | 0.8546 |
| 21 | rs390432    | 37922517 | 393 | 0.05522   | 0.301  | 9.586e-05 | 0.1834    | 0.8546 |
| 21 | rs97959     | 37922599 | 393 | 0.05522   | 0.301  | 9.586e-05 | 0.1834    | 0.8546 |
| 21 | rs9983786   | 37922707 | 393 | -0.001862 | 0.3004 | 1.094e-07 | -0.006196 | 0.9951 |
| 21 | rs452072    | 37922829 | 393 | 0.08934   | 0.3051 | 0.0002443 | 0.2929    | 0.7698 |
| 21 | rs452081    | 37922870 | 393 | 0.05522   | 0.301  | 9.586e-05 | 0.1834    | 0.8546 |
| 21 | rs452128    | 37922878 | 393 | 0.009134  | 0.2997 | 2.646e-06 | 0.03048   | 0.9757 |
| 21 | rs416875    | 37922883 | 393 | 0.05522   | 0.301  | 9.586e-05 | 0.1834    | 0.8546 |
| 21 | rs78059543  | 37922912 | 393 | -0.2278   | 0.5059 | 0.0005773 | -0.4503   | 0.6528 |
| 21 | rs364916    | 37923058 | 393 | 0.05522   | 0.301  | 9.586e-05 | 0.1834    | 0.8546 |
| 21 | rs417191    | 37923068 | 393 | 0.05522   | 0.301  | 9.586e-05 | 0.1834    | 0.8546 |
| 21 | rs8126947   | 37923114 | 393 | 0.08449   | 0.4328 | 0.0001086 | 0.1952    | 0.8453 |
| 21 | rs73380031  | 37923201 | 393 | 0.08449   | 0.4328 | 0.0001086 | 0.1952    | 0.8453 |
| 21 | rs364698    | 37923244 | 393 | 0.02014   | 0.2971 | 1.309e-05 | 0.06777   | 0.946  |
| 21 | rs364846    | 37923259 | 393 | 0.02014   | 0.2971 | 1.309e-05 | 0.06777   | 0.946  |
| 21 | rs365416    | 37923441 | 393 | 0.02014   | 0.2971 | 1.309e-05 | 0.06777   | 0.946  |
| 21 | rs366381    | 37923469 | 393 | 0.02014   | 0.2971 | 1.309e-05 | 0.06777   | 0.946  |
| 21 | rs375662    | 37923963 | 393 | 0.02014   | 0.2971 | 1.309e-05 | 0.06777   | 0.946  |
| 21 | rs375572    | 37923990 | 393 | 0.02014   | 0.2971 | 1.309e-05 | 0.06777   | 0.946  |
| 21 | rs376218    | 37924160 | 393 | 0.02408   | 0.39   | 1.086e-05 | 0.06173   | 0.9508 |
| 21 | rs12626381  | 37924177 | 393 | -0.2278   | 0.5059 | 0.0005773 | -0.4503   | 0.6528 |
| 21 | rs376590    | 37924298 | 393 | -0.036    | 0.3053 | 3.961e-05 | -0.1179   | 0.9062 |
| 21 | 21:37924982 | 37924982 | 393 | -0.03066  | 0.3038 | 2.901e-05 | -0.1009   | 0.9197 |
| 21 | 21:37925036 | 37925036 | 393 | -0.1053   | 0.3282 | 0.0002929 | -0.3207   | 0.7486 |
| 21 | rs417173    | 37925099 | 393 | -0.036    | 0.3053 | 3.961e-05 | -0.1179   | 0.9062 |
| 21 | rs387842    | 37925246 | 393 | -0.036    | 0.3053 | 3.961e-05 | -0.1179   | 0.9062 |
| 21 | rs35210386  | 37925277 | 393 | -0.001862 | 0.3004 | 1.094e-07 | -0.006196 | 0.9951 |
| 21 | rs448014    | 37925373 | 393 | -0.036    | 0.3053 | 3.961e-05 | -0.1179   | 0.9062 |
| 21 | rs377160    | 37925402 | 393 | -0.036    | 0.3053 | 3.961e-05 | -0.1179   | 0.9062 |
| 21 | rs377527    | 37925504 | 393 | -0.036    | 0.3053 | 3.961e-05 | -0.1179   | 0.9062 |
| 21 | rs377574    | 37925556 | 393 | -0.036    | 0.3053 | 3.961e-05 | -0.1179   | 0.9062 |
| 21 | rs440551    | 37925714 | 393 | -0.036    | 0.3053 | 3.961e-05 | -0.1179   | 0.9062 |
| 21 | rs397691    | 37926032 | 393 | -0.08252  | 0.3038 | 0.0002101 | -0.2716   | 0.7861 |
| 21 | rs451163    | 37926378 | 393 | -0.036    | 0.3053 | 3.961e-05 | -0.1179   | 0.9062 |
| 21 | rs451243    | 37926495 | 393 | -0.036    | 0.3053 | 3.961e-05 | -0.1179   | 0.9062 |
| 21 | rs425864    | 37926618 | 393 | -0.036    | 0.3053 | 3.961e-05 | -0.1179   | 0.9062 |
| 21 | rs9984382   | 37926653 | 393 | 0.03215   | 0.3011 | 3.249e-05 | 0.1068    | 0.915  |
| 21 | rs399522    | 37926679 | 393 | -0.036    | 0.3053 | 3.961e-05 | -0.1179   | 0.9062 |
| 21 | rs9984547   | 37926740 | 393 | 0.03215   | 0.3011 | 3.249e-05 | 0.1068    | 0.915  |
| 21 | rs448482    | 37927051 | 393 | -0.036    | 0.3053 | 3.961e-05 | -0.1179   | 0.9062 |
| 21 | rs397990    | 37927157 | 393 | -0.036    | 0.3053 | 3.961e-05 | -0.1179   | 0.9062 |
| 21 | rs397996    | 37927168 | 393 | -0.036    | 0.3053 | 3.961e-05 | -0.1179   | 0.9062 |
| 21 | rs448659    | 37927226 | 393 | -0.036    | 0.3053 | 3.961e-05 | -0.1179   | 0.9062 |
| 21 | rs448849    | 37927426 | 393 | -0.036    | 0.3053 | 3.961e-05 | -0.1179   | 0.9062 |
| 21 | rs438706    | 37927798 | 393 | -0.008516 | 0.2338 | 3.779e-06 | -0.03642  | 0.971  |
| 21 | rs415848    | 37927972 | 393 | -0.036    | 0.3053 | 3.961e-05 | -0.1179   | 0.9062 |
| 21 | rs407095    | 37928065 | 393 | -0.036    | 0.3053 | 3.961e-05 | -0.1179   | 0.9062 |
| 21 | rs416108    | 37928071 | 393 | -0.036    | 0.3053 | 3.961e-05 | -0.1179   | 0.9062 |
| 21 | rs451370    | 37928088 | 393 | -0.036    | 0.3053 | 3.961e-05 | -0.1179   | 0.9062 |
| 21 | rs447184    | 37928162 | 393 | -0.4257   | 0.2784 | 0.00662   | -1.529    | 0.1271 |
| 21 | rs451614    | 37928354 | 393 | -0.036    | 0.3053 | 3.961e-05 | -0.1179   | 0.9062 |
| 21 | rs79257755  | 37928416 | 393 | -0.005218 | 0.4636 | 3.609e-07 | -0.01126  | 0.991  |
| 21 | rs424282    | 37929312 | 393 | 0.02408   | 0.39   | 1.086e-05 | 0.06173   | 0.9508 |

Supplemental material is neither peer-reviewed nor thoroughly edited by CJASN. The authors alone are responsible for the accuracy and presentation of the material.

|    |             |          |     |           |        |           |          |        |
|----|-------------|----------|-----|-----------|--------|-----------|----------|--------|
| 21 | rs447296    | 37929554 | 393 | -0.036    | 0.3053 | 3.961e-05 | -0.1179  | 0.9062 |
| 21 | 21:37929608 | 37929608 | 393 | 0.07204   | 0.3975 | 9.359e-05 | 0.1813   | 0.8563 |
| 21 | rs73206272  | 37929753 | 393 | 0.6263    | 0.458  | 0.0053    | 1.368    | 0.1723 |
| 21 | rs449940    | 37929999 | 393 | -0.036    | 0.3053 | 3.961e-05 | -0.1179  | 0.9062 |
| 21 | rs374314    | 37930129 | 393 | -0.036    | 0.3053 | 3.961e-05 | -0.1179  | 0.9062 |
| 21 | 21:37930791 | 37930791 | 393 | -0.036    | 0.3053 | 3.961e-05 | -0.1179  | 0.9062 |
| 21 | 21:37930793 | 37930793 | 393 | -0.02876  | 0.2941 | 2.725e-05 | -0.09779 | 0.9222 |
| 21 | rs430747    | 37931266 | 393 | -0.02029  | 0.2335 | 2.15e-05  | -0.08688 | 0.9308 |
| 21 | rs365887    | 37931734 | 393 | -0.04736  | 0.3046 | 6.888e-05 | -0.1555  | 0.8765 |
| 21 | rs376519    | 37931985 | 393 | -0.036    | 0.3053 | 3.961e-05 | -0.1179  | 0.9062 |
| 21 | rs8127982   | 37932496 | 393 | -0.1134   | 0.4563 | 0.0001758 | -0.2484  | 0.8039 |
| 21 | rs379699    | 37932871 | 393 | -0.036    | 0.3053 | 3.961e-05 | -0.1179  | 0.9062 |
| 21 | rs405582    | 37932994 | 393 | -0.036    | 0.3053 | 3.961e-05 | -0.1179  | 0.9062 |
| 21 | 21:37933118 | 37933118 | 393 | 0.02408   | 0.39   | 1.086e-05 | 0.06173  | 0.9508 |
| 21 | rs442022    | 37933178 | 393 | -0.036    | 0.3053 | 3.961e-05 | -0.1179  | 0.9062 |
| 21 | rs413852    | 37933623 | 393 | -0.036    | 0.3053 | 3.961e-05 | -0.1179  | 0.9062 |
| 21 | rs79308542  | 37933766 | 393 | -0.005218 | 0.4636 | 3.609e-07 | -0.01126 | 0.991  |
| 21 | rs414911    | 37934064 | 393 | -0.036    | 0.3053 | 3.961e-05 | -0.1179  | 0.9062 |
| 21 | rs371189    | 37934086 | 393 | -0.036    | 0.3053 | 3.961e-05 | -0.1179  | 0.9062 |
| 21 | rs415100    | 37934106 | 393 | -0.036    | 0.3053 | 3.961e-05 | -0.1179  | 0.9062 |
| 21 | rs415124    | 37934131 | 393 | -0.036    | 0.3053 | 3.961e-05 | -0.1179  | 0.9062 |
| 21 | rs372213    | 37934352 | 393 | -0.036    | 0.3053 | 3.961e-05 | -0.1179  | 0.9062 |
| 21 | rs450183    | 37934701 | 393 | -0.036    | 0.3053 | 3.961e-05 | -0.1179  | 0.9062 |
| 21 | rs382620    | 37935093 | 393 | -0.01897  | 0.2188 | 2.142e-05 | -0.0867  | 0.931  |
| 21 | rs409231    | 37935548 | 393 | -0.036    | 0.3053 | 3.961e-05 | -0.1179  | 0.9062 |
| 21 | rs9984896   | 37935669 | 393 | 0.01266   | 0.3023 | 4.994e-06 | 0.04187  | 0.9666 |
| 21 | rs371945    | 37935837 | 393 | -0.036    | 0.3053 | 3.961e-05 | -0.1179  | 0.9062 |
| 21 | rs404515    | 37936188 | 393 | 0.0428    | 0.3951 | 3.344e-05 | 0.1083   | 0.9138 |
| 21 | rs394087    | 37936213 | 393 | -0.036    | 0.3053 | 3.961e-05 | -0.1179  | 0.9062 |
| 21 | rs394110    | 37936245 | 393 | -0.036    | 0.3053 | 3.961e-05 | -0.1179  | 0.9062 |
| 21 | rs373349    | 37936444 | 393 | -0.02029  | 0.2335 | 2.15e-05  | -0.08688 | 0.9308 |
| 21 | rs382635    | 37936605 | 393 | -0.036    | 0.3053 | 3.961e-05 | -0.1179  | 0.9062 |
| 21 | rs405901    | 37936638 | 393 | -0.036    | 0.3053 | 3.961e-05 | -0.1179  | 0.9062 |
| 21 | rs395383    | 37936655 | 393 | -0.036    | 0.3053 | 3.961e-05 | -0.1179  | 0.9062 |
| 21 | rs383609    | 37936906 | 393 | -0.036    | 0.3053 | 3.961e-05 | -0.1179  | 0.9062 |
| 21 | rs428948    | 37936909 | 393 | -0.036    | 0.3053 | 3.961e-05 | -0.1179  | 0.9062 |
| 21 | rs382937    | 37936946 | 393 | -0.036    | 0.3053 | 3.961e-05 | -0.1179  | 0.9062 |
| 21 | rs452107    | 37936959 | 393 | -0.036    | 0.3053 | 3.961e-05 | -0.1179  | 0.9062 |
| 21 | rs429326    | 37937123 | 393 | -0.036    | 0.3053 | 3.961e-05 | -0.1179  | 0.9062 |
| 21 | rs385073    | 37937328 | 393 | -0.02029  | 0.2335 | 2.15e-05  | -0.08688 | 0.9308 |
| 21 | rs452583    | 37937697 | 393 | -0.036    | 0.3053 | 3.961e-05 | -0.1179  | 0.9062 |
| 21 | rs394211    | 37937845 | 393 | -0.036    | 0.3053 | 3.961e-05 | -0.1179  | 0.9062 |
| 21 | rs9981101   | 37937856 | 393 | 0.01266   | 0.3023 | 4.994e-06 | 0.04187  | 0.9666 |
| 21 | rs394565    | 37937966 | 393 | -0.036    | 0.3053 | 3.961e-05 | -0.1179  | 0.9062 |
| 21 | rs377239    | 37938729 | 393 | -0.02029  | 0.2335 | 2.15e-05  | -0.08688 | 0.9308 |
| 21 | rs377284    | 37938758 | 393 | -0.036    | 0.3053 | 3.961e-05 | -0.1179  | 0.9062 |
| 21 | rs28374138  | 37939059 | 393 | 0.01266   | 0.3023 | 4.994e-06 | 0.04187  | 0.9666 |
| 21 | rs11700928  | 37939696 | 393 | -0.1134   | 0.4563 | 0.0001758 | -0.2484  | 0.8039 |
| 21 | rs445103    | 37939775 | 393 | -0.036    | 0.3053 | 3.961e-05 | -0.1179  | 0.9062 |
| 21 | rs412775    | 37939801 | 393 | 0.02408   | 0.39   | 1.086e-05 | 0.06173  | 0.9508 |
| 21 | 21:37940140 | 37940140 | 393 | 0.53      | 0.4459 | 0.004009  | 1.189    | 0.2354 |
| 21 | rs413616    | 37940153 | 393 | 0.02408   | 0.39   | 1.086e-05 | 0.06173  | 0.9508 |
| 21 | rs420925    | 37940863 | 393 | -0.036    | 0.3053 | 3.961e-05 | -0.1179  | 0.9062 |
| 21 | rs7279272   | 37941317 | 393 | -0.1134   | 0.4563 | 0.0001758 | -0.2484  | 0.8039 |
| 21 | rs9305596   | 37942276 | 393 | 0.01266   | 0.3023 | 4.994e-06 | 0.04187  | 0.9666 |
| 21 | rs393851    | 37942749 | 393 | -0.036    | 0.3053 | 3.961e-05 | -0.1179  | 0.9062 |
| 21 | 21:37942914 | 37942914 | 393 | -0.04106  | 0.2181 | 0.000101  | -0.1883  | 0.8508 |
| 21 | rs9975456   | 37943452 | 393 | 0.01266   | 0.3023 | 4.994e-06 | 0.04187  | 0.9666 |
| 21 | rs419941    | 37944184 | 393 | -0.036    | 0.3053 | 3.961e-05 | -0.1179  | 0.9062 |
| 21 | rs420885    | 37944545 | 393 | 0.01998   | 0.2183 | 2.386e-05 | 0.09151  | 0.9271 |
| 21 | 21:37944692 | 37944692 | 393 | 0.01998   | 0.2183 | 2.386e-05 | 0.09151  | 0.9271 |
| 21 | rs9981948   | 37945560 | 393 | -0.007443 | 0.2338 | 2.887e-06 | -0.03184 | 0.9746 |
| 21 | rs9982036   | 37945565 | 393 | 0.0394    | 0.3044 | 4.774e-05 | 0.1294   | 0.8971 |
| 21 | rs73206282  | 37945869 | 393 | 0.6387    | 0.4624 | 0.005406  | 1.381    | 0.1681 |
| 21 | rs405828    | 37947445 | 393 | 0.02475   | 0.2174 | 3.693e-05 | 0.1139   | 0.9094 |

**Supplemental Figure 1. Association between all 482 SNPs in *CLND14* gene and 24-hour calcium excretion.**

All associated SNPs were located into 3' region of this gene. The most significant result was for rs219755 ( $p < 0.001$ ).

Regional plot was obtained by LocusZoom web application.

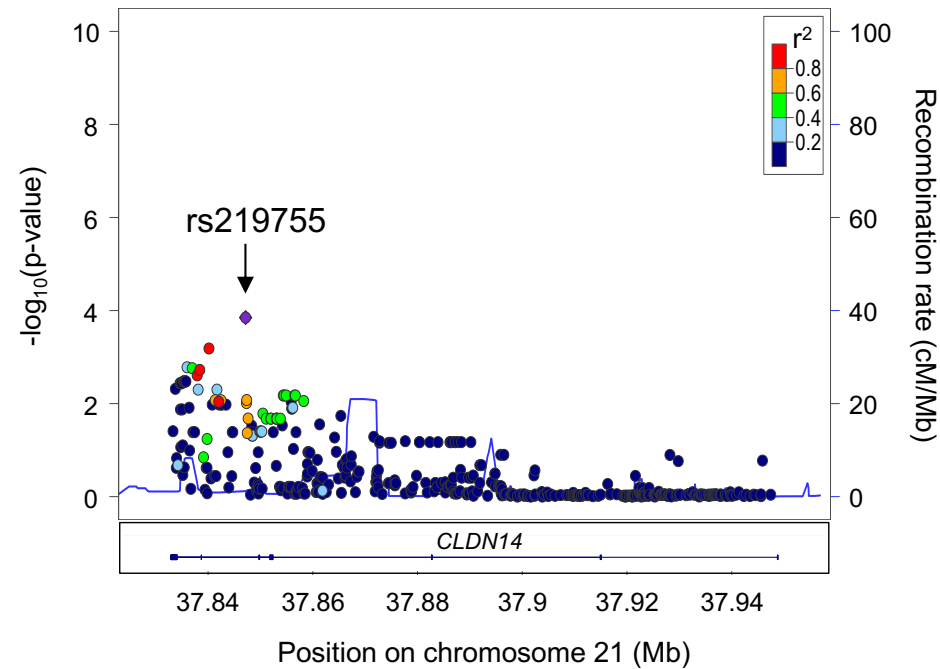



**Supplemental Figure 2. CLDN14 genomic region by GENCODE 27.** Two antisense transcripts, non-protein coding genes are partially overlapped with associated tag SNPs region at CLDN14 (blue box).

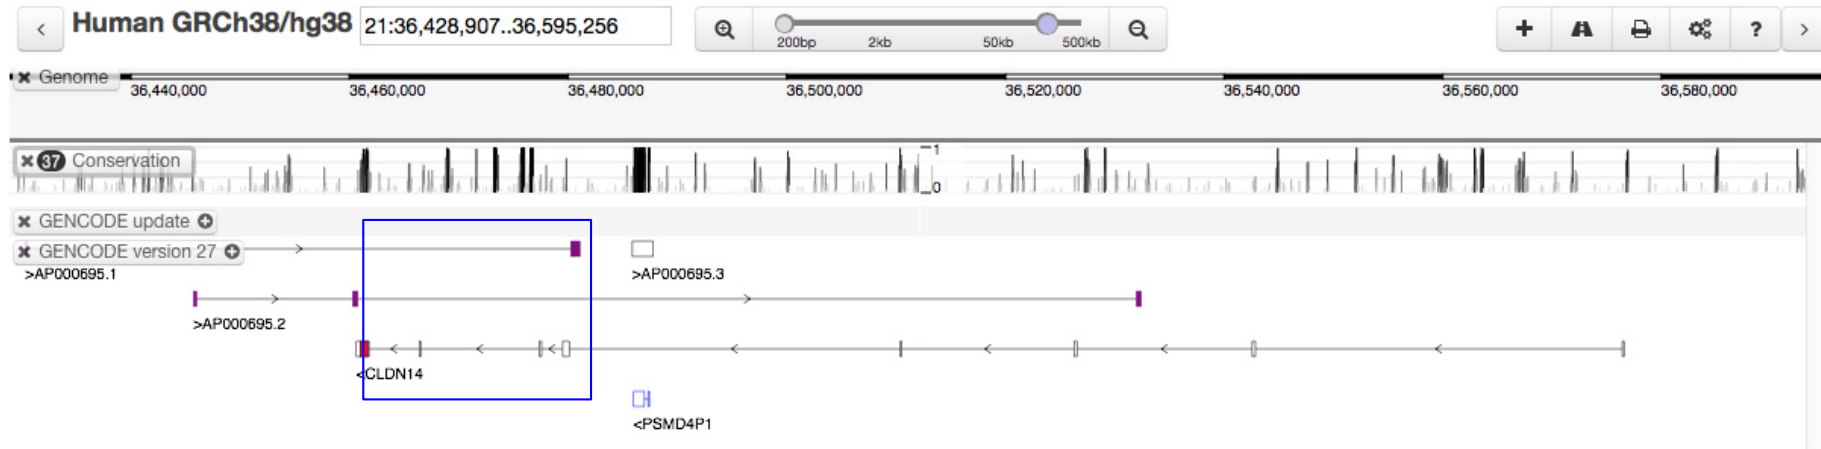

**Supplemental Figure 3. ESEfinder results at CLDN14 rs219780 site.** ESEfinder analysis showed the gain of new consensus motifs of both SRSF1 (IgM-BRCA1), SRSF2, SRSF5 binding sites (A) and of a branch site in the mutant rs219780 A context (B). Gain of new motifs are denoted by a white asterisk.

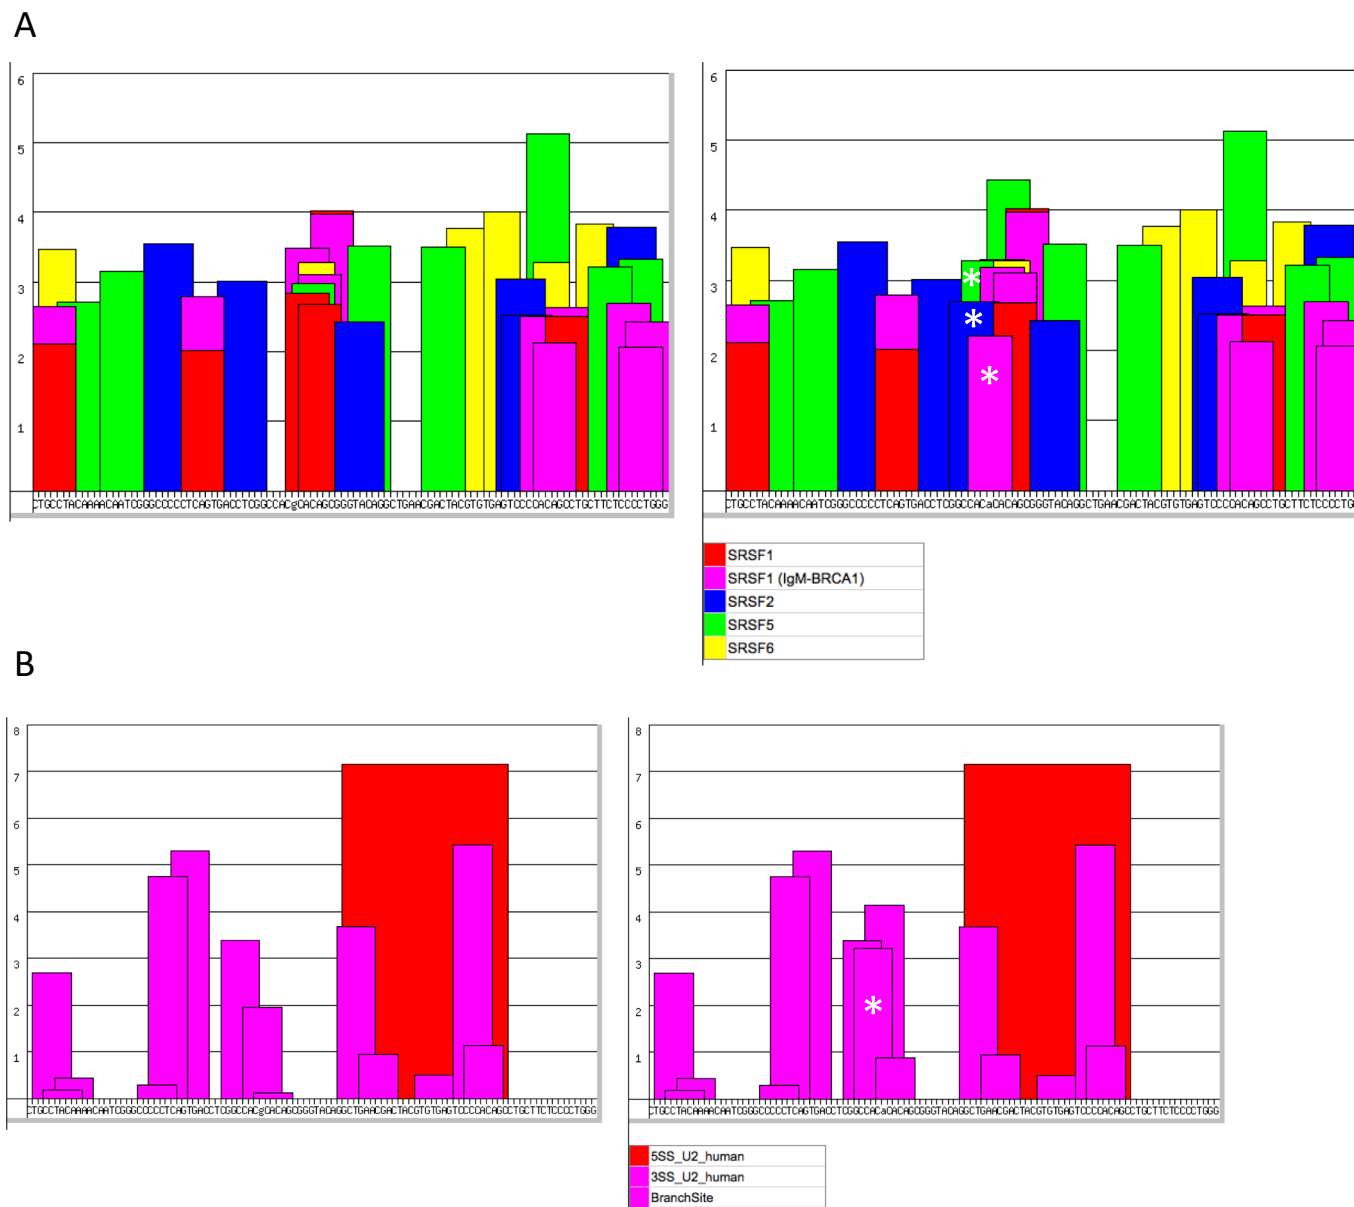

Supplement: CJN.01770218SupplementaryData.pdf [file CJN.01770218SupplementaryData.pdf]
